# Supplementary material
Source: PubMed Central journal article supplement (PMC6411171)
Supplement: jcsm.15.3.409s1.pdf [file jcsm.15.3.409s1.pdf]

Supplementary analyses with ApoE4 as a covariable. Group (OSA, mil/non-OSA) by cognitive status (MCI, non-MCI) ANOVA were significant when we added the ApoE4 as a covariable: Cognitive Failure Questionnaire ( $F(1, 96) = 7.61; p < 0.01$ ); Cognitive Difficulties Scale ( $F(1, 95) = 5.91; p = 0.02$ ); and Self-Evaluation Questionnaire ( $F(1, 75) = 11.99; p = 0.001$ ).

Supplementary analyses with sex as a covariable. Results of the Group (OSA, mil/non-OSA) by cognitive status (MCI, non-MCI) ANOVA remain the same when we added sex as a covariable: Cognitive failure questionnaires ( $F(1,104) = 12.7; p = 0.001$ ), Cognitive difficulties scale ( $F(1,103) = 7.76; p = 0.006$ ), Self-evaluation questionnaires ( $F(1,82) = 17.4; p = 0.000$ ).

Figure S1. Correlations between OSA severity and SCC questionnaires scores.

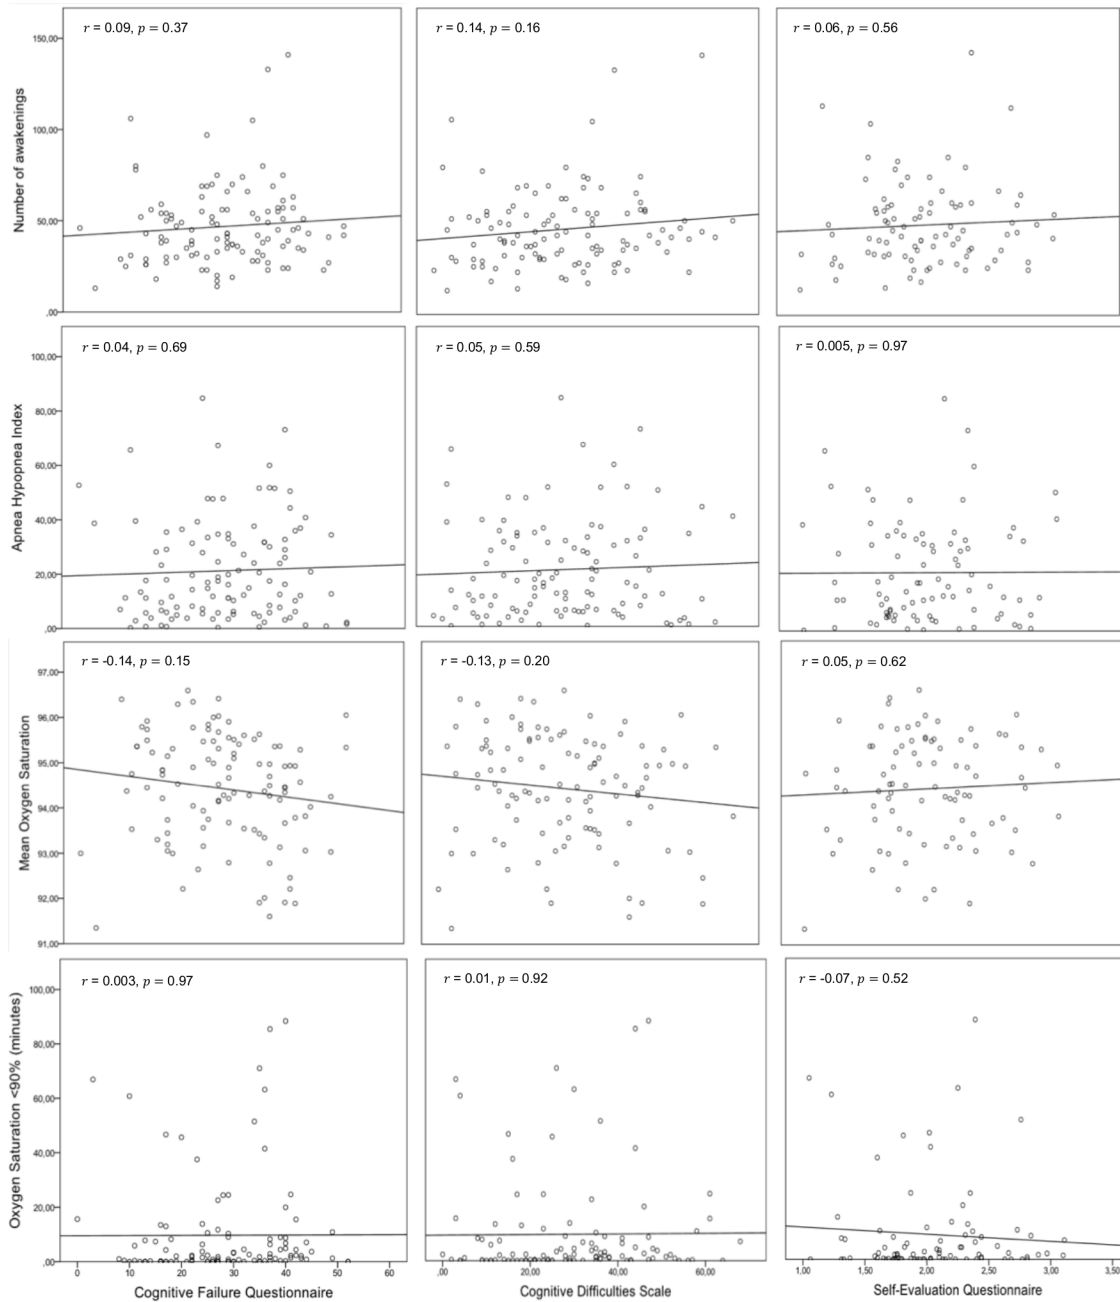

Figure S1 legend: Variables associated with OSA severity such as, number of awakenings, apnea hypopnea index, mean oxygen saturation, and oxygen saturation <90%, were not correlated with SCC questionnaires. OSA, obstructive sleep apnea; SCC, subjective cognitive complaint.

Figure S2. Correlations between mood and sleep quality questionnaires and SCC questionnaires scores.

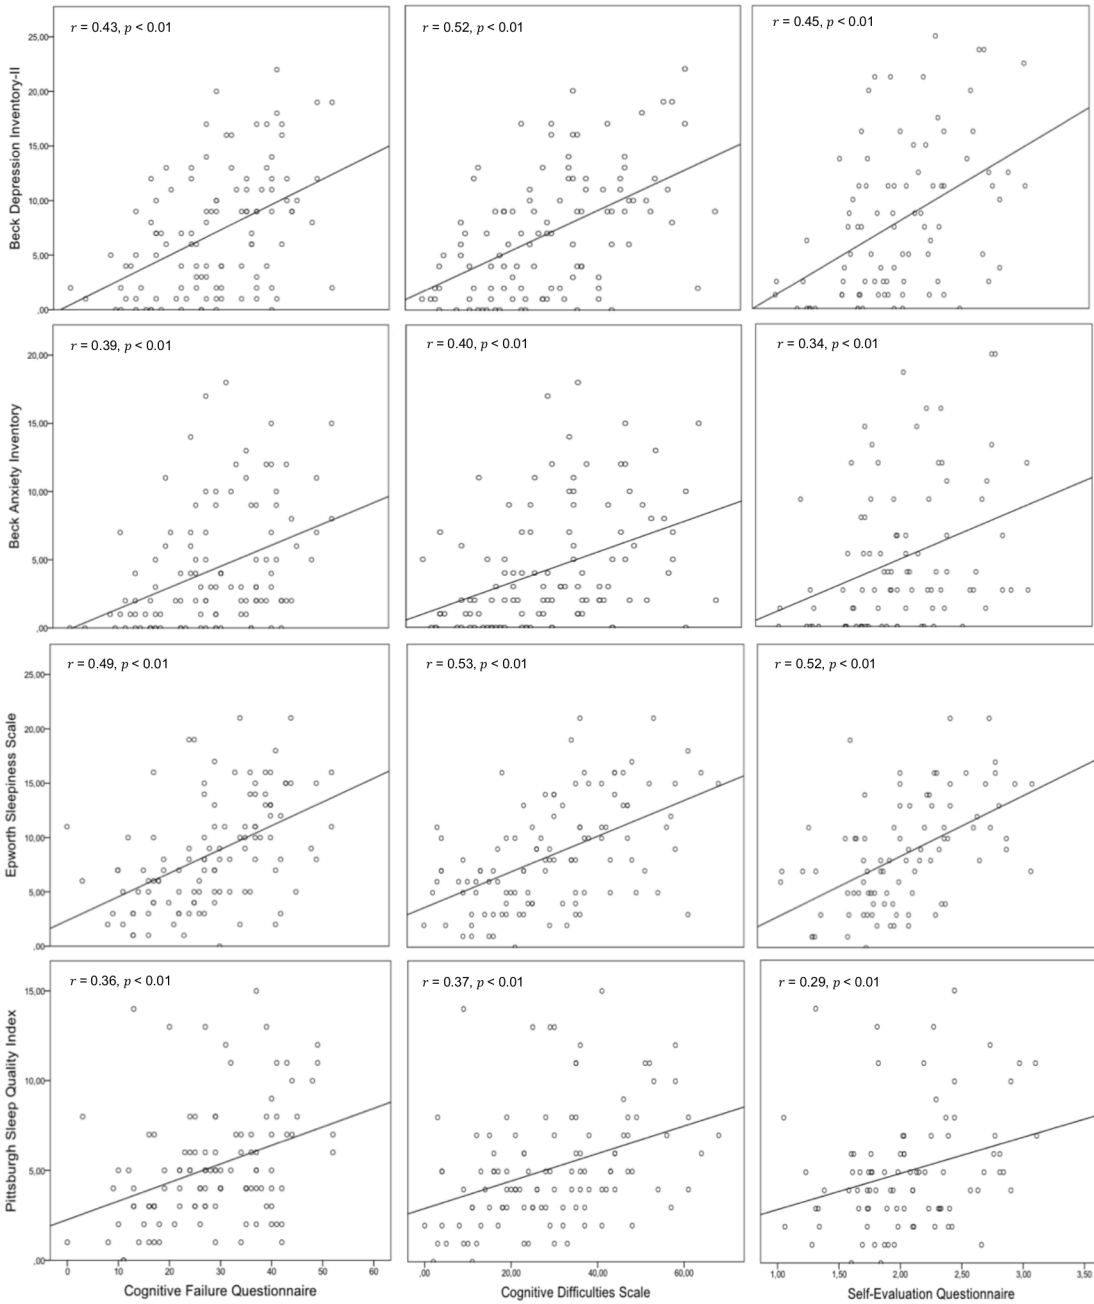

Figure S2 legend: Questionnaires on mood (Beck depression inventory-II, Beck Anxiety Inventory) and sleep quality (Epworth Sleepiness Scale, Pittsburgh Sleep Quality Index), were all significantly correlated to SCC questionnaires. OSA, obstructive sleep apnea; SCC, subjective cognitive complaint.

## References

1. Wechsler D. *Wechsler Adult Intelligence Scale-Third Edition*. San Antonio, TX: The Psychological Corporation; 1997.
2. Conners CK. *Conners' Continuous performance Test (CPT-2) computer program for windows, technical guide, and software manual*. Toronto, ON: Multi Health Systems Inc.; 2000.
3. Delis DC, Kaplan E, Kramer JH. *Delis-Kaplan Executive Function System (D-KEFS)*. San Antonio, TX: The Psychological Corporation; 2001.
4. Tombaugh TN. Trail Making Test A and B: normative data stratified by age and education. *Arch Clin Neuropsychol*. 2004;19(2):203-214.
5. Culbertson WC, Zillmer EA. *Tower fo London-Drexel University, second edition*. Toronto, ON: Multi-Health Systems; 2004.
6. Rey A. L'examen psychologique dans les cas d'encéphalopathie traumatique. *Arch Psychol*. 1941;28(112):286-340.
7. Benedict RHB. *Brief visuospatial memory test - revised: Professionnal manual*. Lutz, FL: Psychological Assessment Ressources, Inc; 1997.
8. Gauthier L, Dehaut F, Joanne Y. The Bells Test: A quantitative and qualitative test for visual neglect. *J Clin Exp Neuropsychol*. 1989;11(2):49-54.
9. Qualls CE, Bliwise NG, Stringer AY. Short forms of the Benton Judgment of Line Orientation Test: development and psychometric properties. *Arch Clin Neuropsychol*. 2000;15(2):159-163.
10. Osterrieth P. Le test de copie d'une figure complexe. *Arch Psychol*. 1944;30:206-356.
11. Kaplan E, Goodglass H, Weintraub S. *Boston Namig Test*. Philadelphia, PA: Lee & Febiger; 1983.
